## ANESTHESIOLOGY

# Transient Receptor Potential Cation Channels and Calcium Dyshomeostasis in a Mouse Model Relevant to Malignant Hyperthermia

Jose Rafael Lopez, M.D., Ph.D., Vikas Kaura, M.D., Phillip Hopkins, M.D., Xiaochen Liu, Ph.D., Arkady Uryach, M.D., Ph.D., Jose Adams, M.D., Paul D. Allen, M.D., Ph.D

ANESTHESIOLOGY 2020; 133:364–76

## EDITOR'S PERSPECTIVE

### What We Already Know about This Topic

- The type 1 ryanodine receptor gene (*RYR1*) encoding the skeletal muscle sarcoplasmic reticulum  $\text{Ca}^{2+}$  release channel is the primary locus for malignant hyperthermia
- Muscle expressing malignant hyperthermia-*RYR1* mutations has chronically elevated intracellular resting calcium and sodium concentrations that increase several-fold on exposure to halothane or isoflurane

### What This Article Tells Us That Is New

- The hypothesis that transient receptor potential cation channels play a critical role in causing intracellular calcium and sodium overload in malignant hyperthermia susceptible muscle was tested in a *RYR1*-p.G2435R knock-in murine model of malignant hyperthermia
- Skeletal muscle of mice expressing *RYR1*-p.G2435R had a significantly enhanced, extracellular  $\text{Ca}^{2+}$ -dependent response to TRPC3/6 channel activators
- The TRPC3/6 channel activator response could be prevented by TRPC3/6 channel blockers
- Local administration of TRPC channel blockers during an active malignant hyperthermia crisis demonstrated that most of the rise in intracellular resting calcium in skeletal muscle comes from the extracellular space and not sarcoplasmic reticulum stores

Malignant hyperthermia is an autosomal dominant hypermetabolic condition triggered by volatile anesthetics and depolarizing neuromuscular blockers.<sup>1</sup> The

## ABSTRACT

**Background:** Until recently, the mechanism for the malignant hyperthermia crisis has been attributed solely to sustained massive  $\text{Ca}^{2+}$  release from the sarcoplasmic reticulum on exposure to triggering agents. This study tested the hypothesis that transient receptor potential cation (TRPC) channels are important contributors to the  $\text{Ca}^{2+}$  dyshomeostasis in a mouse model relevant to malignant hyperthermia.

**Methods:** This study examined the mechanisms responsible for  $\text{Ca}^{2+}$  dyshomeostasis in *RYR1*-p.G2435R mouse muscles and muscle cells using calcium and sodium ion selective microelectrodes, manganese quench of Fura2 fluorescence, and Western blots.

**Results:** *RYR1*-p.G2435R mouse muscle cells have chronically elevated intracellular resting calcium and sodium and rate of manganese quench (homozygous greater than heterozygous) compared with wild-type muscles. After exposure to 1-oleoyl-2-acetyl-sn-glycerol, a TRPC3/6 activator, increases in intracellular resting calcium/sodium were significantly greater in *RYR1*-p.G2435R muscles (from  $153 \pm 11 \text{ nM}/10 \pm 0.5 \text{ mM}$  to  $304 \pm 45 \text{ nM}/14.2 \pm 0.7 \text{ mM}$  in heterozygotes  $P < 0.001$ ) and from  $251 \pm 25 \text{ nM}/13.9 \pm 0.5 \text{ mM}$  to  $534 \pm 64 \text{ nM}/20.9 \pm 1.5 \text{ mM}$  in homozygotes [ $P < 0.001$ ] compared with  $123 \pm 3 \text{ nM}/8 \pm 0.1 \text{ mM}$  to  $196 \pm 27 \text{ nM}/9.4 \pm 0.7 \text{ mM}$  in wild type). These increases were inhibited both by simply removing extracellular  $\text{Ca}^{2+}$  and by exposure to either a nonspecific (gadolinium) or a newly available, more specific pharmacologic agent (SAR7334) to block TRPC6- and TRPC3-mediated cation influx into cells. Furthermore, local pretreatment with SAR7334 partially decreased the elevation of intracellular resting calcium that is seen in *RYR1*-p.G2435R muscles during exposure to halothane. Western blot analysis showed that expression of TRPC3 and TRPC6 were significantly increased in *RYR1*-p.G2435R muscles in a gene-dose-dependent manner, supporting their being a primary molecular basis for increased sarcolemmal cation influx.

**Conclusions:** Muscle cells in knock-in mice expressing the *RYR1*-p.G2435R mutation are hypersensitive to TRPC3/6 activators. This hypersensitivity can be negated with pharmacologic agents that block TRPC3/6 activity. This reinforces the working hypothesis that transient receptor potential cation channels play a critical role in causing intracellular calcium and sodium overload in malignant hyperthermia-susceptible muscle, both at rest and during the malignant hyperthermia crisis.

(ANESTHESIOLOGY 2020; 133:364–76)

malignant hyperthermia crisis is characterized by hypercapnia, tachycardia, hypoxemia, muscle rigidity, hypermetabolism, respiratory and metabolic acidosis, and hyperthermia. Human malignant hyperthermia-susceptible individuals appear for the most part to remain subclinical until challenged with pharmacologic triggering agents.<sup>1–3</sup> Once the syndrome is triggered, if left untreated, the mortality of a

Part of the work presented in this article has been presented as a poster at the 63rd Annual Meeting of the Biophysical Society in Baltimore, Maryland, March 2–6, 2019. J.R.L. and V.K. contributed equally to this article.

Submitted for publication December 26, 2019. Accepted for publication April 28, 2020. Published online first on June 5, 2020. From the Department of Molecular Biosciences, School of Veterinary Medicine, University of California at Davis, Davis, California (J.R.L., P.D.A.); the Department of Research (J.R.L.) and the Division of Neonatology (A.U., J.A.), Mount Sinai Medical Center, Miami, Florida; and the Malignant Hyperthermia Investigation Unit, St. James' University Hospital, Leeds, United Kingdom (V.K., P.H., X.L., P.D.A.).

Copyright © 2020, the American Society of Anesthesiologists, Inc. All Rights Reserved. Anesthesiology 2020; 133:364–76. DOI: 10.1097/ALN.0000000000003387

fulminant malignant hyperthermia episode is higher than 70%, but availability of dantrolene has reduced the mortality to less than 8%.<sup>1,2</sup> Molecular genetic studies have established the type 1 ryanodine receptor gene (*RYR1*) encoding the skeletal muscle sarcoplasmic reticulum  $\text{Ca}^{2+}$  release channel as the primary locus for malignant hyperthermia.<sup>3–6</sup> More than 200 *RYR1* mutations found throughout the gene have been associated with malignant hyperthermia.<sup>6</sup> To date, one spontaneously occurring porcine model (p.R615C) and four murine knock-in models expressing the murine equivalent of human (p.R163C,<sup>7</sup> p.Y522S,<sup>8</sup> p.G2434R,<sup>9</sup> and p.T4826I<sup>10</sup>) *RYR1* mutations have been studied in detail. All five models exhibit fulminant anesthetic-triggered malignant hyperthermia episodes and heat intolerance with varying gene–dose relationships. The *RYR1*-p.G2435R variant, which is the focus of this study, is a model for the most frequent variant associated with malignant hyperthermia in the United Kingdom and North America. In addition, this is the most common *RYR1* variant to be associated with familial genotype–phenotype discordance.<sup>11</sup> It is associated with a relatively weak *in vitro* contracture test phenotype and is less likely to be associated with an elevated serum creatine kinase compared with p.T4826I and p.R163C.<sup>12,13</sup>

The exact molecular mechanisms by which *RYR1* mutations confer malignant hyperthermia susceptibility are unknown. A common characteristic of muscle expressing malignant hyperthermia-*RYR1* mutations compared with nonsusceptible muscle is an increased resting intracellular calcium concentration in humans<sup>14</sup> and animal models.<sup>15–18</sup> We have shown that exposure to halothane or isoflurane at clinically relevant concentrations causes intracellular calcium concentration to rise several-fold in malignant hyperthermia muscle in experimental animal models, whereas exposure to the same concentrations of halothane or isoflurane had no effect in nonsusceptible muscle.<sup>17,19,20</sup>

Until recently, the mechanism for the malignant hyperthermia crisis has been attributed solely to massive self-sustaining release of  $\text{Ca}^{2+}$  from the sarcoplasmic reticulum on exposure to triggering agents. Counter to this view, we have introduced a new paradigm that implicates nonspecific sarcolemmal cation entry channels as the predominant source of acute elevations in both intracellular calcium concentration and intracellular sodium concentration during fulminant malignant hyperthermia and are significant contributors to chronically elevated intracellular calcium concentration and intracellular sodium concentration in quiescent malignant hyperthermia-susceptible muscles.<sup>21,22</sup>

The aim of the current study was to use newly available more specific pharmacologic agents and physiologic studies to probe transient receptor potential cation channel (TRPC) function, allowing us to refine their importance in initiating and supporting the malignant hyperthermia crisis in response to triggering agents and with these new data test the hypothesis that TRPCs play a major role in

the  $\text{Ca}^{2+}$  dyshomeostasis that we recently described in a *RYR1*-p.G2435R knock-in murine model of malignant hyperthermia<sup>9</sup> similar to our previous observations in the *RYR1*-p.R163C mouse.<sup>21,22</sup>

## Material and Methods

### Animals

The animals used in this study were housed in pathogen-free conditions with free access to food and water and 12-h light-and-dark cycles. All experiments were undertaken with approval from the United Kingdom Home Office, the University of California at Davis Institutional Animal Care and Use Committee, or the Mount Sinai Hospital Institutional Animal Care and Use Committee. For single fiber and *in vivo* studies, a mixture of male and female mice between 12 and 16 weeks of age were used, and for myotube studies, myoblasts were isolated from 3- to 5-week-old neonatal mice. All experiments were terminal. For *in vivo* experiments, the malignant hyperthermia animals were allowed to succumb to isoflurane anesthesia when this was used; otherwise they and all wild-type animals were euthanized by cervical dislocation. For muscle collection, all animals were euthanized by cervical dislocation immediately before dissection. Because homozygous animals were viable, the animals were obtained and allocated to homozygous and heterozygous experimental groups by selective breeding of homozygous females to either homozygous or wild-type C57BL/6J males. The animals were used as available in the breeding colony when they reached the appropriate age. Studies on wild-type mice were done on 3- to 5-month-old C57BL/6J animals purchased from Charles River Laboratories (USA) or the St. James's animal facility (United Kingdom) as needed.

### Experimental Preparation

The experiments were conducted at room temperature ( $\sim 23^\circ\text{C}$ ): (1) *in vitro* using flexor digitorum brevis muscle fibers from 3- to 5-month-old C57BL/6J (wild-type), heterozygous *RYR1*-p.G2435R, and homozygous *RYR1*-p.G2435R mice: single fibers were obtained by enzymatic digestion as described previously<sup>21</sup>; (2) *in vivo*, in vastus lateralis fibers in wild-type and *RYR1*-p.G2435R mice anesthetized with ketamine/xylazine (100/5 mg/kg body weight) as described previously<sup>22</sup>; and (3) *in vitro* using myotubes differentiated from myoblasts from C57BL/6 (wild-type), *RYR1*-p.G2435R heterozygous, and *RYR1*-p.G2435R homozygous mice as described in detail previously.<sup>9</sup>

### Preparation of Calcium and Sodium Selective Microelectrodes

Double-barreled calcium and sodium selective microelectrodes were prepared as described previously.<sup>14,22</sup> Each ion-selective microelectrode was individually calibrated

before and after the determination of intracellular calcium concentration and intracellular  $\text{Na}^+$  concentration as described before.<sup>22</sup> Only those  $\text{Ca}^{2+}$ -selective microelectrodes with a linear relationship between pCa 3 and 7 (Nernstian response, 29.5 and 30.5 mV/pCa unit at 23 and 37°C, respectively) were used experimentally. The  $\text{Na}^+$ -selective microelectrodes gave virtually Nernstian responses at free sodium concentrations between 100 and 10 mM. However, although at concentrations between 10 and 1 mM  $\text{Na}^+$ , the electrodes had a sub-Nernstian response (40 to 45 mV), their response was of a sufficient amplitude to be able to measure intracellular sodium concentration. The sensitivity and response of the calcium- and sodium-selective microelectrodes were not directly affected by any of the drugs used in the present study.

### Calcium and Sodium Determinations in Muscle Fibers

Microelectrode recordings were performed as described previously.<sup>22</sup> Single isolated adult flexor digitorum brevis muscle fibers (*in vitro*) or vastus lateralis muscle fibers (*in vivo*) from wild-type and *RYR1*-p.G2435R heterozygous and homozygous mice were impaled with either double-barreled  $\text{Ca}^{2+}$  or double-barreled  $\text{Na}^+$ -selective microelectrodes, and their potentials were recorded *via* a high-impedance amplifier (WPI Duo 773 electrometer; WPI, USA). The potential from the 3 M potassium chloride microelectrode was subtracted electronically from the potential of either the calcium electrode or the sodium electrode to produce a differential calcium-specific potential or sodium-specific potential that represents the intracellular calcium concentration or intracellular sodium concentration, respectively. All electrode potentials were filtered (30 to 50 kHz) to improve the signal-to-noise ratio and stored in a computer for further analysis. The data from any given electrode impalement were accepted if the 3 M potassium chloride microelectrode potential was greater than or equal to  $-80\text{mV}$ , and we were able to make a stable recording of both the 3 M potassium chloride microelectrode potential and the calcium or sodium-specific potential for 60 s. These criteria resulted in rejection of data from 20% of *in vivo* impalements and 30 to 35% of *in vitro* impalements. There was no genotype effect on rejection rate.

### Measurements of Manganese Quench of Fura2 in Myotubes and Isolated Single Fibers

When the  $\text{Ca}^{2+}$  indicator Fura2 is exposed to manganese, its fluorescence at its isobestic emission wavelength is quenched. Because TRPC3, TRPC6, Orai1, Orai2, Orai3, and slow voltage-gated  $\text{Ca}^{2+}$  channels are permeable to manganese as well as  $\text{Ca}^{2+}$ , the rate of manganese quench can be used to determine the rate of  $\text{Ca}^{2+}$  entry into a cell.

We used manganese quench to assess sarcolemmal divalent cation entry in myotubes or isolated single adult muscle fibers loaded with 5  $\mu\text{M}$  Fura2-AM for 30 min at 37°C.

The solution containing the Fura2-AM was washed off, and the cells were maintained for 25 min at room temperature to allow deesterification and equilibration of the intracellular Fura2. The cells were observed through a  $40\times 1.3$  NA objective on a Nikon Eclipse T2000 epifluorescence microscope using an excitation wavelength of  $360 \pm 5\text{ nm}$  (the isosbestic wavelength of Fura2 at which the fluorescence of the dye is independent of the  $\text{Ca}^{2+}$ -free state *vs.* the  $\text{Ca}^{2+}$ -bound state), and the emission signal was measured at  $510 \pm 40\text{ nm}$ . Images were captured with  $2 \times 2$  binning at a rate of 5 frames/s using an intensified 12-bit digital intensified charge-coupled device (ORCA-ER) and IPLab software. Regions of interest in individual cells were analyzed using ImageJ software (National Institutes of Health), with the data exported to GraphPad Prism 7. Prism was used to fit linear regression models ( $y = mx + c$ ) for the basal signal in imaging buffer and then independently in manganese-containing solutions with and without treatment drugs. The specific rate of Fura2 quenching induced by manganese entry was calculated by subtracting the basal slope of decline of fluorescence over time from the slope during the application of manganese buffer (*i.e.*, net slope) and is expressed as arbitrary fluorescence units/s. The net slope was calculated in the absence and presence of treatment drugs. Cells with a positive net slope after the addition of manganese buffer were excluded from analysis because this indicated a technical problem with the measurement. For the same reason the slope of the quench signal was normalized to 0 when the net slope was positive after treatment with a cation channel antagonist.

### Western Blot Analysis of TRPC3 and TRPC6 Expression.

Gastrocnemius muscles from all genotypes were dissected, minced, and homogenized in modified radioimmunoassay precipitation assay buffer. Total protein concentration was determined using the bicinchoninic acid method (Thermo Scientific, USA). Samples of whole gastrocnemius homogenate were prepared as described by Altamirano *et al.*<sup>21</sup> and incubated overnight at 4°C with primary antibodies: rabbit anti-transient receptor potential cation channel 3 (TRPC3), dilution 1:2,500 (ab51560; Abcam, USA), rabbit anti-TRPC6, dilution 1:2,500 (ab62461; Abcam), human anti-actin, dilution of 1:5,000 (SC8432; Santa Cruz, USA). All of these antibodies have been validated previously by different research groups and our laboratory. The resolved bands were detected with a Storm 860 imaging system (GE Bio-Sciences, USA). The protein levels were quantified using myImageAnalysis software (Thermo Fisher Scientific, USA) and normalized to  $\beta$ -actin.

### Solutions

The mammalian Ringer solution used for experiments using muscle fibers had the following composition: 140 mM NaCl, 5 mM KCl, 2 mM  $\text{CaCl}_2$ , 1 mM  $\text{MgCl}_2$ , 5 mM glucose, and 10 mM HEPES, pH 7.4. The imaging buffer used for the experiments with myotubes contained 133 mM

NaCl, 5 mM KCl, 2 mM  $\text{CaCl}_2$ , 1 mM  $\text{MgCl}_2$ , 5.5 mM glucose, and 10 mM HEPES, pH 7.4. In the manganese buffer, the  $\text{CaCl}_2$  and  $\text{MgCl}_2$  were substituted with 0.5 mM  $\text{MnCl}_2$ . The  $\text{Ca}^{2+}$ -free solution had the following composition: 140 mM NaCl, 5 mM KCl, 2 mM  $\text{MgCl}_2$ , 1 mM EGTA, 5 mM glucose, and 10 mM HEPES, pH 7.4. 1-Oleoyl-2-acetyl-*sn*-glycerol, gadolinium, SAR7334, and hyperforin solutions were made by adding the desired concentration of the reagent to the physiologic or manganese-containing solutions.

## Statistics

Neither randomization nor blinding of the investigator performing the test was used for these studies. No specific power calculation was conducted before experimentation, but the rationale for the sample sizes used was based on our previous studies using this and other animal models of malignant hyperthermia with the same and different pharmacologic interventions. All values of intracellular ion concentrations are expressed as means  $\pm$  SD, with  $N_{\text{mice}}$  representing the number of mice used to collect muscle fibers or used for the *in vivo* experiments and  $N_{\text{fibers}}$  representing the number of myotubes or muscle fibers in which measurements were carried out. Statistical analysis for studies done on muscle fibers both *in vitro* and *in vivo* was performed using one-way between-genotypes ANOVA with Tukey *post hoc* test for multiple measurements to determine significance. The results of Western blots were analyzed using Student's unpaired independent *t* test. Normal distribution of the data was verified by histogram analysis. For studies of manganese quench in myotubes, the results were not normally distributed and therefore are expressed as the median and interquartile range. These results were analyzed using a Kruskal–Wallis test with Dunn's multiple comparison to determine significance.  $P < 0.05$  was accepted as the minimum confidence level for significance for all comparisons, but the *P* values obtained for each comparison are reported. With the exception of the myotube manganese quench studies, in which positive quench data were excluded or normalized to zero as described above, and muscle fiber data, in which the criteria for a successful measurement was not met (based on either a depolarized membrane potential or lack of stable electrode recording for 60 s), no outlying data were removed from the data collected before or after analysis. All statistical analyses were performed using GraphPad Prism 7 software.

## Results

### Resting Intracellular Calcium and Sodium Concentrations

Malignant hyperthermia is characterized by an intracellular  $\text{Ca}^{2+}$  and  $\text{Na}^+$  dyshomeostasis.<sup>14,19,22,23</sup> Consequently, intracellular calcium concentration or intracellular sodium concentration was measured in quiescent single muscle

fibers isolated from wild-type, *RYR1*-p.G2435R heterozygous, and *RYR1*-p.G2435R homozygous cells using double-barreled ion-specific microelectrodes. The intracellular calcium concentration was  $120 \pm 2$  nM ( $N = 8$ ) in wild-type mice, whereas it was  $156 \pm 11$  nM ( $N = 11$ ) in *RYR1*-p.G2435R heterozygous and  $275 \pm 15$  nM ( $N = 10$ ) in homozygous ( $P < 0.001$  for both; fig. 1A) mice. Likewise, intracellular sodium concentration was more elevated in *RYR1*-p.G2435R heterozygous and homozygous fibers than that observed in wild-type fibers. The intracellular sodium concentration was  $8 \pm 0.1$  mM ( $N = 8$ ) in wild-type fibers, whereas it was  $10 \pm 1$  mM ( $N = 9$ ) in *RYR1*-p.G2435R heterozygotes and  $14 \pm 0.6$  mM ( $N = 11$ ) in *RYR1*-p.G2435R homozygotes, respectively ( $P < 0.001$  for both; fig. 1A). The resting membrane potentials were not different among genotypes ( $-82 \pm 1.2$  mV [ $N = 29$ ] in resting wild-type muscle fibers,  $-82 \pm 1.3$  mV [ $N = 31$ ] in *RYR1*-p.G2435R heterozygous muscle fibers, and  $-1 \pm 2.3$  mV [ $N = 34$ ] in *RYR1*-p.G2435R homozygous muscle fibers).

As previously reported, similar differences for intracellular calcium concentration and intracellular sodium concentration were obtained in the *in vivo* measurements carried out on the vastus lateralis from wild-type and malignant hyperthermia mice.<sup>9</sup> In a new data set carried out for this study, intracellular calcium concentration in wild-type mice was  $122 \pm 3$  nM ( $N = 15$ ) compared with  $144 \pm 9$  nM ( $N = 14$ ) and  $259 \pm 31$  nM ( $N = 18$ ) in *RYR1*-p.G2435R heterozygous and *RYR1*-p.G2435R homozygous muscles, respectively (fig. 1B). Intracellular sodium concentration was  $8 \pm 0.1$  mM ( $N = 16$ ) in wild-type mice compared with  $9.5 \pm 1$  mM ( $N = 16$ ) and  $12.9 \pm 1.5$  mM ( $N = 13$ ) in *RYR1*-p.G2435R heterozygous and *RYR1*-p.G2435R homozygous muscles, respectively ( $P < 0.001$  compared with wild-type muscles; fig. 1B). Taken together, the results demonstrate that there is a comparable intracellular calcium and sodium overload in both isolated *RYR1*-p.G2435R muscle cells and intact muscle fibers compared with wild-type muscle fiber and that resting intracellular ion recordings under *in vitro* conditions recapitulate those found *in vivo*.

### 1-Oleoyl-2-acetyl-*sn*-glycerol Induces an Elevation of Intracellular Calcium and Sodium Concentrations

To directly investigate the effect of diacylglycerol on intracellular calcium and intracellular sodium concentrations, single muscle fibers were exposed to 1-oleoyl-2-acetyl-*sn*-glycerol, a membrane-permeable diacylglycerol analog that has been shown to activate transient receptor potential cation channel subfamily C member 3 (TRPC3) and member 6 (TRPC6) channels.<sup>24</sup> Incubation of muscle fibers in 1-oleoyl-2-acetyl-*sn*-glycerol (100  $\mu\text{M}$ ) for 5 min produced an elevation of intracellular calcium concentration in all genotypes. In wild-type mice, the intracellular calcium concentration was increased by 60% (from  $123 \pm$



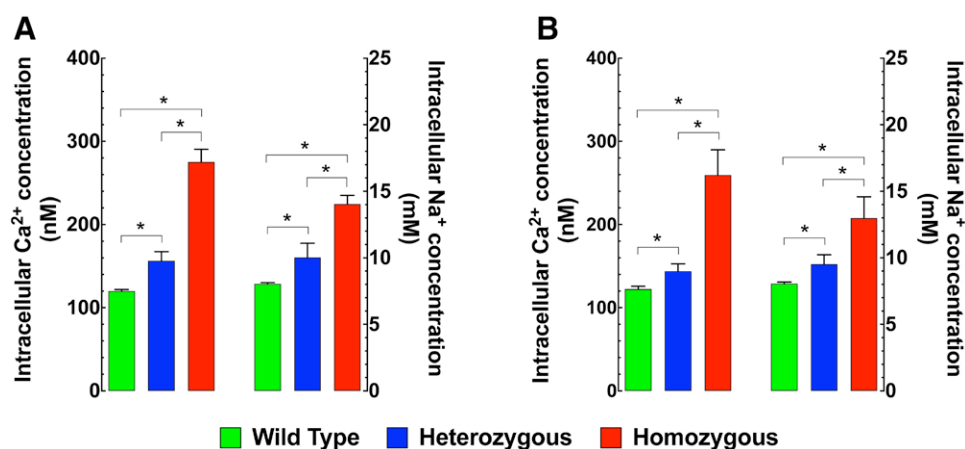

**Fig. 1.** Elevated intracellular Ca<sup>2+</sup> and Na<sup>+</sup> concentrations in *RYR1*-p.G2435R malignant hyperthermia muscle cells. Intracellular Ca<sup>2+</sup> or Na<sup>+</sup> concentration was measured in quiescent flexor digitorum brevis fibers isolated from wild-type, *RYR1*-p.G2435R heterozygous, and *RYR1*-p.G2435R homozygous mice (A) and *in vivo* from the vastus lateralis fibers in anesthetized wild-type, *RYR1*-p.G2435R heterozygous, and *RYR1*-p.G2435R homozygous mice (B) using double-barreled ion-specific microelectrodes. *In vitro*,  $N_{\text{mice}} = 3$  per experimental condition,  $N_{\text{cell}} = 15$  to 18 per genotype for intracellular Ca<sup>2+</sup> concentration measurements;  $N_{\text{mice}} = 3$  per experimental condition,  $N_{\text{cell}} = 15$  to 18 per genotype for intracellular Na<sup>+</sup> concentration measurements. *In vivo*,  $N_{\text{mice}} = 4$  per genotype,  $N_{\text{cell}} = 13$  to 16 per experimental condition for intracellular Ca<sup>2+</sup> concentration measurements;  $N_{\text{mice}} = 5$  per experimental condition,  $N_{\text{cell}} = 8$  to 11 per genotype for intracellular Na<sup>+</sup> concentration measurements. The values are expressed as means  $\pm$  SD for each condition; one-way ANOVA with Tukey *post hoc* test. \* $P \leq 0.05$ .

3 nM [ $N = 11$ ] to  $196 \pm 27$  nM [ $N = 13$ ],  $P < 0.001$ ); in *RYR1*-p.G2435R heterozygous fibers, it was enhanced by 99% (from  $153 \pm 11$  nM [ $N = 12$ ] to  $304 \pm 45$  nM [ $N$

$= 11$ ],  $P < 0.001$ ); and in *RYR1*-p.G2435R homozygous fibers, it was elevated by 113% (from  $251 \pm 25$  nM [ $N = 12$ ] to  $534 \pm 64$  nM [ $N = 13$ ],  $P < 0.001$ ; fig. 2A).

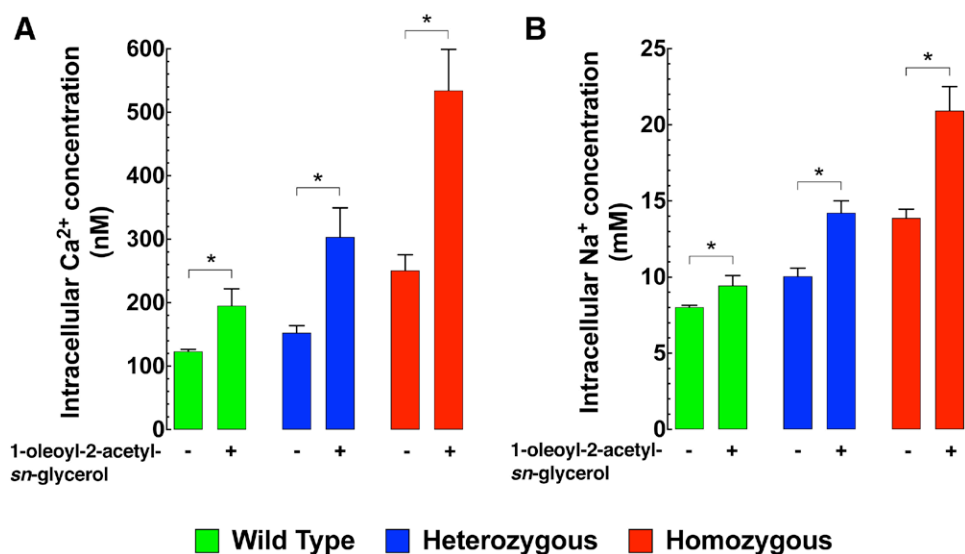

**Fig. 2.** 1-Oleoyl-2-acetyl-*sn*-glycerol provokes elevation of intracellular Ca<sup>2+</sup> and Na<sup>+</sup> concentrations. Exposure of quiescent flexor digitorum brevis fibers to 1-oleoyl-2-acetyl-*sn*-glycerol 100  $\mu$ M induced an elevation of intracellular Ca<sup>2+</sup> (A) and Na<sup>+</sup> concentration (B) that was greater in *RYR1*-p.G2435R fibers (homozygous greater than heterozygous) than wild-type muscle fibers. Over the horizontal axis are indicated the experimental conditions. For intracellular Ca<sup>2+</sup> concentration measurements,  $N_{\text{mice}} = 3$  per experimental condition,  $N_{\text{cell}} = 11$  to 13 per genotype. For intracellular Na<sup>+</sup> concentration measurements,  $N_{\text{mice}} = 3$  per experimental condition,  $N_{\text{cell}} = 9$  to 10 per genotype. The values are expressed as means  $\pm$  SD for each condition; one-way ANOVA with Tukey *post hoc* test. \* $P \leq 0.05$ .

Because the permeability of TRPCs is cation-specific but not  $\text{Ca}^{2+}$ -specific, their activation could also increase sodium entry and intracellular sodium concentration. Application of 1-oleoyl-2-acetyl-*sn*-glycerol (100  $\mu\text{M}$ ) significantly elevated intracellular sodium concentration in all genotypes, but its effect was greater in *RYR1*-p.G2435R muscle cells than in wild-type muscle cells (fig. 2B). In wild-type mice, incubation with 1-oleoyl-2-acetyl-*sn*-glycerol elevated intracellular sodium concentration by 18% (from  $8 \pm 0.1 \text{ mM}$ ,  $N = 10$  to  $9.4 \pm 0.7 \text{ mM}$ ,  $N = 9$ ,  $P < 0.001$ ), in *RYR1*-p.G2435R heterozygous by 42% (from  $10 \pm 0.5 \text{ mM}$ ,  $N = 10$  to  $14.2 \pm 0.7 \text{ mM}$ ,  $N = 9$ ,  $P < 0.001$ ), and in *RYR1*-p.G2435R homozygous by 50% (from  $13.9 \pm 0.5 \text{ mM}$ ,  $N = 9$  to  $20.9 \pm 1.5 \text{ mM}$ ,  $N = 10$ ,  $P < 0.001$ ). These elevations of intracellular calcium and sodium concentrations induced by 1-oleoyl-2-acetyl-*sn*-glycerol were not affected by the voltage-gated  $\text{Ca}^{2+}$  channel inhibitor nifedipine (10  $\mu\text{M}$ ) nor associated with changes in resting membrane potential in either wild-type or *RYR1*-p.G2435R muscle fibers (data not shown).

### Removal of Extracellular $\text{Ca}^{2+}$ Prevented Increases in Intracellular Calcium Concentration Induced by 1-Oleoyl-2-acetyl-*sn*-glycerol

In a different set of experiments, we explored the contribution of the  $\text{Ca}^{2+}$  influx on intracellular calcium concentration elevation elicited by 1-oleoyl-2-acetyl-*sn*-glycerol. Single wild-type and *RYR1*-p.G2435R muscle fibers were incubated for 5 min in  $\text{Ca}^{2+}$ -free solution before 1-oleoyl-2-acetyl-*sn*-glycerol (100  $\mu\text{M}$ ) treatment. This exposure significantly reduced intracellular calcium concentration in all genotypes but had a greater effect in *RYR1*-p.G2435R mice than in wild-type mice (fig. 3). In wild-type fibers,  $\text{Ca}^{2+}$ -free solution reduced intracellular calcium concentration from  $123 \pm 4 \text{ nM}$  ( $N = 10$ ) to  $98 \pm 6 \text{ nM}$  ( $N = 12$ ,  $P < 0.001$ ), whereas in *RYR1*-p.G2435R heterozygous fibers, it was reduced from  $161 \pm 26 \text{ nM}$  ( $N = 14$ ) to  $136 \pm 6 \text{ nM}$  ( $N = 12$ ,  $P < 0.001$ ), and in *RYR1*-p.G2435R homozygous fibers, it decreased from  $256 \pm 27 \text{ nM}$  ( $N = 12$ ) to  $176 \pm 17 \text{ nM}$  ( $N = 14$ ,  $P < 0.001$ ). In addition, the observed rise in intracellular calcium concentration elicited by 1-oleoyl-2-acetyl-*sn*-glycerol was completely inhibited in both wild-type and *RYR1*-p.G2435R muscle fibers in the absence of extracellular  $\text{Ca}^{2+}$  (fig. 3).

### Blocking Sarcolemmal Calcium and Sodium Entry with Gadolinium Abolishes the Increases in Intracellular Calcium and Sodium Concentrations Elicited by 1-Oleoyl-2-acetyl-*sn*-glycerol

To gain further insight into molecular mechanisms for the increased sarcolemmal  $\text{Ca}^{2+}$  and  $\text{Na}^{+}$  entry responsible for the elevation in intracellular calcium and sodium concentrations after exposure to 1-oleoyl-2-acetyl-*sn*-glycerol, we measured intracellular calcium concentration and

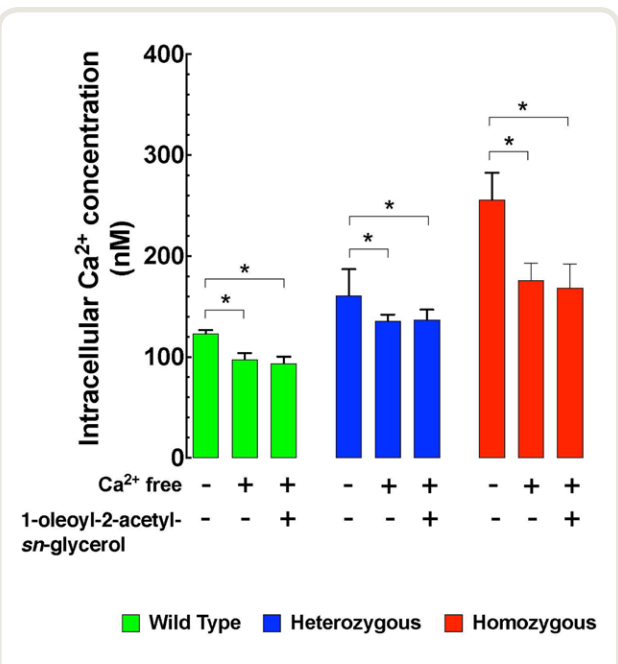

**Fig. 3.** Removal of extracellular  $\text{Ca}^{2+}$  prevents the 1-oleoyl-2-acetyl-*sn*-glycerol-induced increase in intracellular  $\text{Ca}^{2+}$  concentration. Removal of extracellular  $\text{Ca}^{2+}$  lowered the intracellular  $\text{Ca}^{2+}$  concentration and provoked the inhibition of 1-oleoyl-2-acetyl-*sn*-glycerol (100  $\mu\text{M}$ )–induced elevation of intracellular  $\text{Ca}^{2+}$  concentration in flexor digitorum brevis fibers isolated from Wild type, *RYR1*-p.G2435R heterozygous, and *RYR1*-p.G2435R homozygous mice. On the horizontal axis are indicated the experimental conditions used. For intracellular  $\text{Ca}^{2+}$  concentration measurements:  $N_{\text{mice}} = 3$  per experimental condition,  $N_{\text{cell}} = 10$  to 14 per genotype. Values are expressed as means  $\pm$  SD for each condition. One-way ANOVA with Tukey *post hoc* test. \* $P \leq 0.05$ .

intracellular sodium concentration in isolated single wild-type and *RYR1*-p.G2435R muscle fibers before and after incubation in gadolinium and then in the presence of gadolinium, after exposure to 1-oleoyl-2-acetyl-*sn*-glycerol (100  $\mu\text{M}$ ). Pretreatment with 25  $\mu\text{M}$  gadolinium significantly lowered intracellular calcium concentration and intracellular sodium concentration by 15% and by 8%, respectively, in wild-type fibers; by 20% by 15%, respectively, in *RYR1*-p.G2435R heterozygous fibers; and by 27% and 29%, respectively, in *RYR1*-p.G2435R homozygous fibers (figs. 4, A and B). Furthermore, gadolinium pretreatment prevented any significant increase in intracellular calcium and sodium concentrations during exposure to 1-oleoyl-2-acetyl-*sn*-glycerol in all genotypes (figs. 4, A and B).

### SAR7334 Blocks the Effects of 1-Oleoyl-2-acetyl-*sn*-glycerol

Because gadolinium is a nonspecific sarcolemmal cation blocker, SAR7334, a newer more specific blocker of TRPC6 and TRPC3 channels,<sup>25</sup> was used to further characterize the mechanism for the 1-oleoyl-2-acetyl-*sn*-glycerol-mediated increase in intracellular calcium concentration.

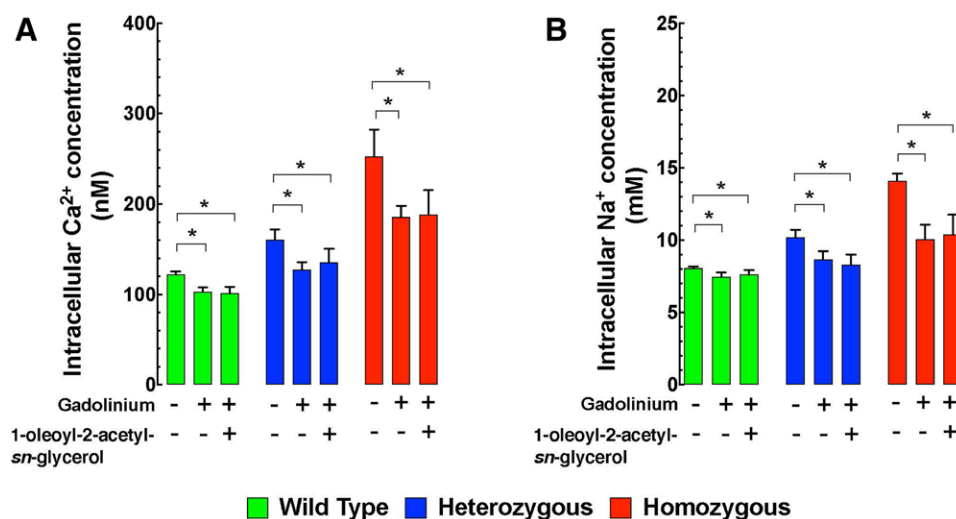

**Fig. 4.** Gadolinium abolishes the 1-oleoyl-2-acetyl-sn-glycerol effects on intracellular Ca<sup>2+</sup> and Na<sup>+</sup> concentrations. Preincubation of wild-type, *RYR1*-p.G2435R heterozygous, and *RYR1*-p.G2435R homozygous flexor digitorum brevis fibers in gadolinium (25  $\mu$ M) reduced the intracellular Ca<sup>2+</sup> and Na<sup>+</sup> concentrations and eliminated the increase in intracellular Ca<sup>2+</sup> (A) and Na<sup>+</sup> concentrations (B) induced by 1-oleoyl-2-acetyl-sn-glycerol. Over the horizontal axis are indicated the experimental conditions used. For intracellular Ca<sup>2+</sup> determinations,  $N_{\text{mice}} = 4$  per experimental condition,  $N_{\text{cell}} = 17$  to 19 per genotype. For intracellular Na<sup>+</sup> determinations,  $N_{\text{mice}} = 4$  per experimental condition,  $N_{\text{cell}} = 13$  to 15 per genotype. The values are expressed as means  $\pm$  SD for each condition; one-way ANOVA with Tukey *post hoc* test. \* $P \leq 0.05$ .

Single isolated wild-type and *RYR1*-p.G2435R muscle fibers were incubated in 1  $\mu$ M SAR7334 and then exposed to 1-oleoyl-2-acetyl-sn-glycerol (100  $\mu$ M). Pretreatment with SAR7334 significantly reduced the resting intracellular calcium concentration by 14% in wild-type fibers, by 19% in *RYR1*-p.G2435R heterozygous fibers, and by 34% in *RYR1*-p.G2435R homozygous fibers (fig. 5A). Furthermore, SAR7334 also prevented the 1-oleoyl-2-acetyl-sn-glycerol-mediated elevation of intracellular calcium concentration in all three genotypes (fig. 5A).

### SAR7334 Partially Blocked the Elevation of Intracellular Calcium Concentration Associated with Malignant Hyperthermia Episode

Having observed inhibition of the 1-oleoyl-2-acetyl-sn-glycerol-induced increase in intracellular calcium concentration by SAR7334 in wild-type and *RYR1*-p.G2435R single muscle fibers, we then tested the activity of this TRPC3/6 channel blocker during a malignant hyperthermia episode. We therefore investigated the effect of SAR7334 on intracellular calcium concentration in malignant hyperthermia muscle *in vivo* during exposure to 2% halothane. The intracellular calcium concentration was measured simultaneously in the right and left vastus lateralis muscles in wild-type and homozygous *RYR1*-p.G2435R mice before and after the addition of 2% halothane to their inspired gas (fig. 5B). The right vastus lateralis muscle was pretreated locally with 1  $\mu$ M SAR7334, and the

left muscle served as the control. Figure 5B shows a typical *in vivo* experiment carried out in a homozygous *RYR1*-p.G2435R mouse. The data are reported as nanomolar (nM). Before drug treatment, the intracellular calcium concentration was very similar in muscles from both legs ( $265 \pm 9$  nM in the left leg *vs.*  $275 \pm 9$  nM in the right leg). Ten minutes after the application of 1  $\mu$ M SAR7334 on the exposed vastus lateralis fibers of the right leg, the intracellular calcium concentration was reduced from  $265 \pm 9$  to  $187 \pm 11$  nM (fig. 5B). Inhalation of halothane elicited an elevation of intracellular calcium concentration in the untreated leg to  $1,373 \pm 81$  nM, whereas in the SAR7334-treated leg, the initial increase in intracellular calcium concentration was reduced by 62% ( $526 \pm 99$  nM), after which intracellular calcium concentration declined to  $453 \pm 32$  nM (fig. 5B). After 20 min of inhalation of halothane, the rectal temperature reached 42°C, and the mouse died.

### Hyperforin Induced Elevation of Intracellular Calcium and Sodium Concentrations

Hyperforin is known to elevate the intracellular concentration of Ca<sup>2+</sup> through the activation of di-acyl-glycerol-sensitive TRPC6 channels without activating the other transient receptor potential cation channel isoforms (TRPC1, TRPC3, TRPC4, TRPC5, and TRPC7).<sup>26</sup> Hyperforin (5  $\mu$ M) caused a prominent sustained rise in intracellular calcium concentration that was greater in *RYR1*-p.G2435R fibers (homozygous greater than heterozygous)

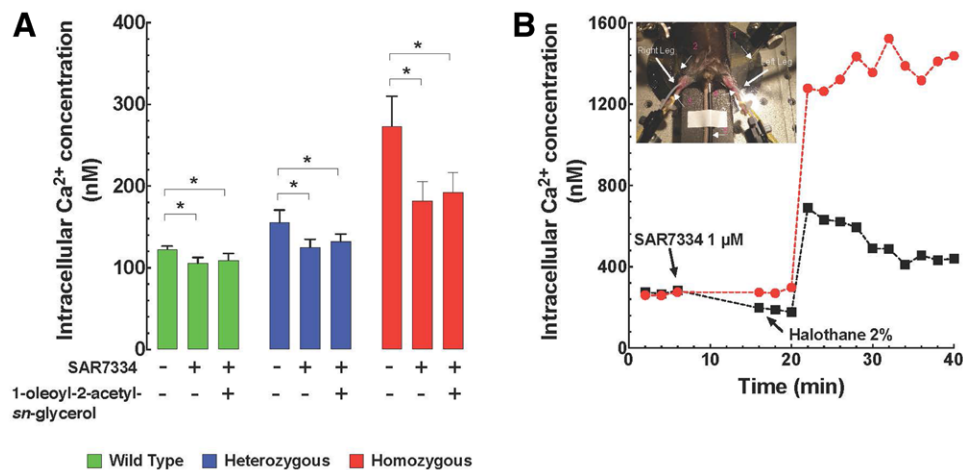

**Fig. 5.** SAR7334 blocked the elevation of intracellular Ca<sup>2+</sup> concentration induced by 1-oleoyl-2-acetyl-sn-glycerol and partially inhibited the increase associated with a malignant hyperthermia episode. Intracellular Ca<sup>2+</sup> concentration was measured in wild-type, *RYR1*-p.G2435R heterozygous, and *RYR1*-p.G2435R homozygous flexor digitorum brevis fibers before and after incubation in SAR7334 (1  $\mu$ M), as well as after the incubation in SAR7334 when exposed to 1-oleoyl-2-acetyl-sn-glycerol (100  $\mu$ M). (A) Preincubation in SAR7334 reduced intracellular Ca<sup>2+</sup> concentration in all genotypes and prevented the increase in intracellular calcium concentration induced by 1-oleoyl-2-acetyl-sn-glycerol. Over the horizontal axis are indicated the experimental conditions. (B) Typical experiment carried out *in vivo* in *RYR1*-p.G2435R homozygous mice anesthetized with 100 mg/kg ketamine and 50 mg/kg xylazine. Intracellular calcium concentration was measured simultaneously in the superficial fibers of the vastus lateralis muscle in the right and left hind limb. Superficial muscle fibers were superfused with Ringer solution alone (left leg, control, red line) or SAR7334 (1  $\mu$ M) for 5 min (right leg, black line), and the mouse was then exposed to 2% halothane by inhalation (black arrow). The inset in the left upper corner shows the experimental arrangement. Arrows 1 and 2, Ca<sup>2+</sup> microelectrodes; arrows 3 and 4, grounds; arrow 5, rectal temperature probe. For intracellular Ca<sup>2+</sup> concentration measurements in (A),  $N_{\text{mice}} = 4$  per genotype,  $N_{\text{cell}} = 13$  to 18 per experimental condition. The values are expressed as means  $\pm$  SD for each condition; one-way ANOVA with Tukey *post hoc* test. \* $P \leq 0.05$ .

than wild-type muscle fibers (fig. 6A). In wild-type muscle fibers, intracellular calcium concentration was enhanced from  $124 \pm 3$  nM ( $N = 9$ ) to  $151 \pm 10$  nM ( $N = 10$ ) upon incubation with hyperforin, whereas in *RYR1*-p.G2435R heterozygous fibers, it increased from  $164 \pm 22$  nM ( $N = 10$ ) to  $234 \pm 31$  nM ( $N = 10$ ), and in *RYR1*-p.G2435R homozygous fibers, it was elevated from  $269 \pm 37$  nM ( $N = 10$ ) to  $441 \pm 41$  nM ( $N = 10$ ; fig. 6A). Removal of extracellular Ca<sup>2+</sup> reduced pre-exposure intracellular calcium concentration and blocked the hyperforin effect in all genotypes (fig. 6C). Similar to its effect on intracellular calcium concentration, hyperforin elevated intracellular sodium concentration in wild-type fibers from  $8 \pm 0.1$  mM ( $N = 15$ ) to  $9.5 \pm 0.6$  mM ( $N = 10$ ;  $P < 0.001$ ), in *RYR1*-p.G2435R heterozygous fibers from  $10 \pm 0.6$  mM ( $N = 15$ ) to  $13.5 \pm 1$  mM ( $N = 10$ ;  $P < 0.001$ ), and in *RYR1*-p.G2435R homozygous fibers from  $14.5 \pm 1.2$  mM ( $N = 11$ ) to  $20.3 \pm 1.6$  mM ( $N = 13$ ;  $P < 0.001$ ; fig. 6B).

**Effects of Genotype and Sarcolemmal Cation Entry Agonists and Antagonists on Manganese Quench of Fura2 in Differentiated Myotubes.** When the buffer was changed from imaging buffer to manganese quench buffer, baseline quench of Fura2 fluorescence was observed in all three genotypes (fig. 7A for representative traces reported as arbitrary fluorescence

units) with the median quench rate being greater in malignant hyperthermia-homozygous ( $-0.23$  arbitrary fluorescence units/s; interquartile range,  $-0.13$  to  $-0.38$  arbitrary fluorescence units/s) versus malignant hyperthermia-heterozygous ( $-0.18$  arbitrary fluorescence units/s; interquartile range,  $-0.11$  to  $-0.32$  arbitrary fluorescence units/s) and wild-type mice ( $-0.19$  arbitrary fluorescence units/s; interquartile range,  $-0.12$  to  $-0.32$  arbitrary fluorescence units/s; fig. 7B). Qualitatively similar results were observed in isolated adult single muscle fibers (data not shown).

We next determined the effect of sarcolemmal cation blockers 25  $\mu$ M gadolinium (a nonspecific sarcolemmal cation entry blocker) and 250 nM SAR7334 (a transient receptor potential cation channel specific blocker) on the rate of manganese quench of the Fura2 fluorescence signal. Treatment with 25  $\mu$ M gadolinium profoundly blocked manganese quench to near baseline levels in all three genotypes ( $P < 0.0001$ ,  $N = 65$  to 96; fig. 7B). The reduction in the median quench rate was 88% in wild-type myotubes ( $N = 65$ ), 100% in heterozygous *RYR1*-p.G2435R myotubes ( $N = 72$ ), and 95.6% in homozygous *RYR1*-p.G2435R myotubes ( $N = 96$ ; fig. 7B). After treatment with 250 nM SAR7334 in wild-type myotubes, the change in median quench rate was not significant (8%,  $P > 0.999$ ,  $N = 49$ ), whereas in heterozygous



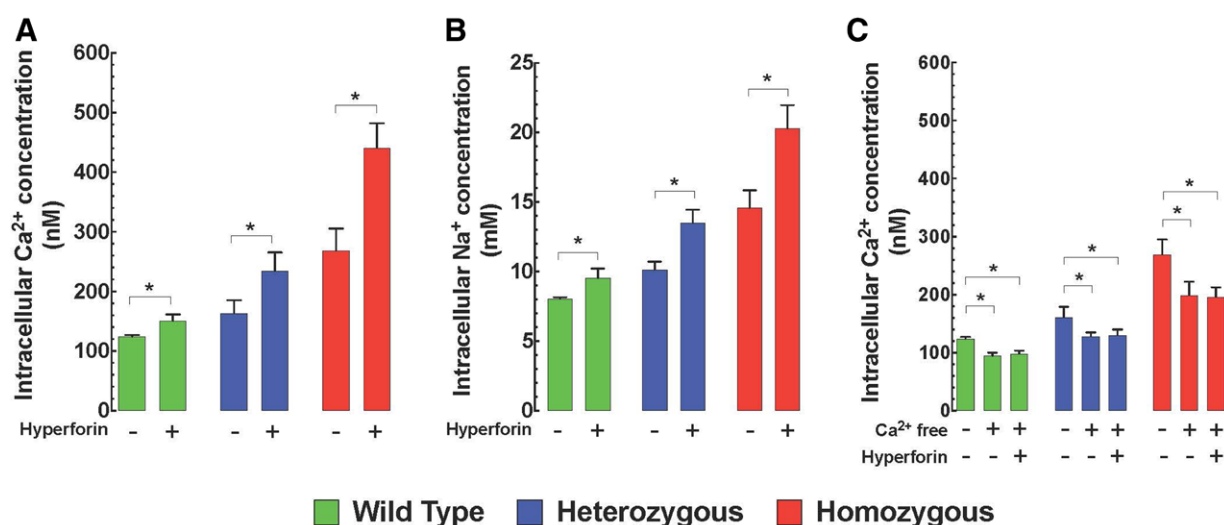

**Fig. 6.** Effect of hyperforin on intracellular  $\text{Ca}^{2+}$  and  $\text{Na}^{+}$  concentrations. Hyperforin ( $5 \mu\text{M}$ ) caused a sustained rise in intracellular  $\text{Ca}^{2+}$  and  $\text{Na}^{+}$  concentration in single flexor digitorum brevis muscle fibers that were greater in *RYR1*-p.G2435R mice (homozygous greater than heterozygous) than in wild-type mice (A and B). Removal of extracellular  $\text{Ca}^{2+}$  inhibited the hyperforin effect on intracellular  $\text{Ca}^{2+}$  concentration (C). On the horizontal axes are indicated the experimental conditions. For intracellular  $\text{Ca}^{2+}$  concentration determinations in (A),  $N_{\text{mice}} = 3$  per experimental condition,  $N_{\text{cell}} = 9$  to 10 per genotype. For intracellular  $\text{Na}^{+}$  concentration determinations in (B),  $N_{\text{mice}} = 3$  per experimental condition,  $N_{\text{cell}} = 10$  to 15 per genotype. For intracellular  $\text{Ca}^{2+}$  concentration determinations in (C),  $N_{\text{mice}} = 3$  per experimental condition,  $N_{\text{cell}} = 10$  to 12 per genotype. The values are expressed as means  $\pm$  SD for each condition; paired and unpaired *t* test and one-way ANOVA with Tukey *post hoc* test.  $*P \leq 0.05$ .

*RYR1*-p.G2435R myotubes and in homozygous *RYR1*-p.G2435R myotubes, there was a significant decrease (45%,  $P < 0.005$ ,  $N = 53$  and 69%,  $P < 0.001$ ,  $N = 35$  for heterozygous and homozygous *RYR1*-p.G2435R myotubes, respectively) in the median manganese quench rate (fig. 7B).

**Protein Expression Differences in Wild-type and *RYR1*-p.G2435R Muscle.** Western blot analysis showed that TRPC3 and TRPC6 were significantly increased in a gene-dose-dependent manner in *RYR1*-p.G2435R muscles (heterozygous [ $P < 0.01$ ] and homozygous [ $P < 0.001$ ]) compared with wild-type mice. Figure 8A shows representative Western blot analysis of the expression of TRPC3 and TRPC6 in wild-type, heterozygous *RYR1*-p.G2435R, and homozygous *RYR1*-p.G2435R muscle;  $\beta$ -actin was used as a loading control. Densitometric analysis of five independent Western blots for each transient receptor potential cation channel protein is shown in figure 8B.

## Discussion

The major findings of the present study are as follows.

- (1) We confirmed our previous finding<sup>9</sup> that *RYR1*-p.G2435R muscle cells have chronically elevated intracellular resting calcium and sodium concentrations (greater in homozygous than in heterozygous mice) and now show that this is associated with elevated manganese quench indicating increased sarcolemmal cation influx.

- (2) Compared with wild-type muscle cells, incubation of *RYR1*-p.G2435R muscle cells with 1-oleoyl-2-acetyl-*sn*-glycerol or the TRPC6 activator hyperforin significantly increased intracellular calcium and sodium concentrations (greater in homozygous than heterozygous muscle cells).
- (3) Increases in intracellular calcium and sodium concentrations induced by 1-oleoyl-2-acetyl-*sn*-glycerol are dependent on extracellular  $\text{Ca}^{2+}$  and are blocked by the nonspecific sarcolemmal cation channel blocker gadolinium, as well as the more specific TRPC3 and TRPC6 channel blocker SAR7334.
- (4) SAR7334 treatment also significantly reduced resting intracellular calcium and sodium concentrations, blocked manganese quench, and reduced the elevation of intracellular calcium in *RYR1*-p.G2435R fibers after exposure to halothane.
- (5) The observed changes in the above *RYR1*-p.G2434R responses were accompanied by an increase in the protein expression of TRPC3 and TRPC6 in *RYR1*-p.G2435R (homozygous greater than heterozygous) skeletal muscles compared with wild-type muscles.

For some time, it has been thought that the mechanism behind the increased resting intracellular calcium in malignant hyperthermia susceptible muscle is simply due to sarcoplasmic reticulum leak and that the massive increase in muscle intracellular calcium during an

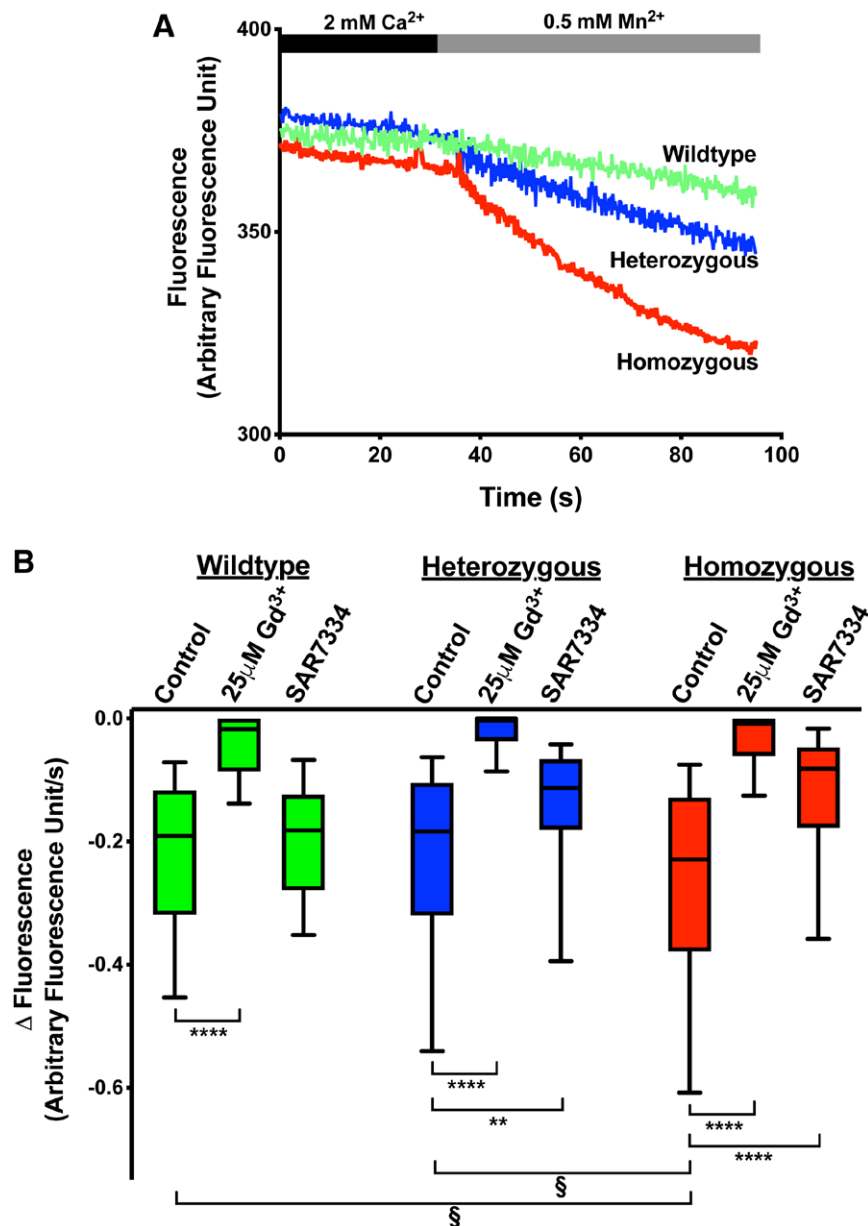

**Fig. 7.** Resting sarcolemmal divalent cation permeability in myotubes. (A) Representative traces indicating the change in the rate of the Fura2 fluorescence that was quenched by  $\text{Mn}^{2+}$  in wild-type, heterozygous, and homozygous myotubes from *RYR1*-p.G2435R mice after changing from imaging buffer to manganese buffer. (B) Box plots showing the quench rate (median and interquartile range) in control, 25  $\mu\text{M}$  gadolinium-treated, or 250 nM SAR7334-treated myotubes from each of the three genotypes. The whiskers represent the 10th to 90th percentile. A larger rate of quench is represented by a more negative number, and this indicates a greater cationic entry through the sarcolemmal cation channels into the cell from the extracellular space, which is an estimate of the sarcolemmal permeability to  $\text{Ca}^{2+}$ .  $\$P < 0.05$  in *RYR1*-p.G2435R homozygous versus *RYR1*-p.G2435R heterozygous and wild-type mice.  $**P < 0.005$  and  $****P < 0.0001$  in each genotype (Kruskal–Wallis test with Dunn’s multiple comparisons test,  $N \geq 35$  myotubes for each condition).

malignant hyperthermia episode comes from and is maintained by sarcoplasmic reticulum  $\text{Ca}^{2+}$  stores. Based on our studies in other animal models relevant to malignant hyperthermia, we have previously suggested that sarcolemmal cation entry channels are, at the very least,

significant contributors to the chronically elevated intracellular calcium in quiescent malignant hyperthermia muscles and myotubes<sup>21,22</sup> and that they play a similarly significant role during a fulminant malignant hyperthermia episode.<sup>22</sup>

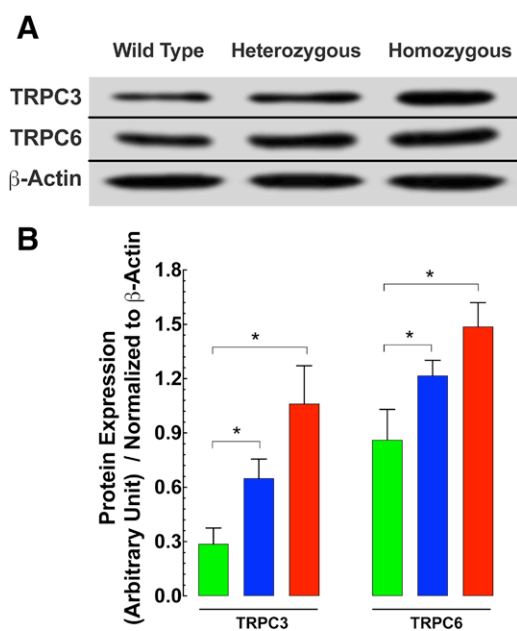

**Fig. 8.** (A) Representative Western blots showing the expression of TRPC3, TRPC6, and  $\beta$ -actin in wild-type, *RYR1*-p.G2435R heterozygous, and *RYR1*-p.G2435R homozygous gastrocnemius muscles. (B) Densitometric analysis of five independent Western blots for each transient receptor potential cation protein. The data were normalized to  $\beta$ -actin and are expressed as means  $\pm$  SD.  $N_{\text{muscles}} = 8$ ; Student's unpaired independent *t* test. \* $P \leq 0.05$ .

A primary finding was that in addition to increased resting intracellular calcium, resting intracellular sodium is also elevated in *RYR1*-p.G2435R muscle cells (homozygous greater than heterozygous) compared with wild-type muscle cells, both *in vitro* and *in vivo*.<sup>21,22</sup> This suggests that at least one source of  $\text{Ca}^{2+}$  could be the extracellular pool and not the sarcoplasmic reticulum. In this study, we confirmed this hypothesis, showing that incubation of muscle with gadolinium, a potent nonspecific inhibitor of sarcolemmal cation influx, significantly reduced the intracellular levels of sodium and calcium and blocked manganese quench, a monitor of sarcolemmal cation entry.

Di-acyl-glycerol is a second messenger involved in key cellular processes in skeletal muscle and other excitable cells.<sup>27</sup> In addition to its role as a lipid second messenger to recruit protein kinases C, it also activates the di-acyl-glycerol-sensitive TRPC3/6 subgroup of transient receptor potential cation channels in the sarcolemma.<sup>24,28</sup> Here we utilized the membrane-permeable di-acyl-glycerol analog, 1-oleoyl-2-acetyl-*sn*-glycerol to determine whether the pathway for sarcolemmal sodium and calcium influx was through TRPC3 and TRPC6.<sup>29,30</sup> 1-Oleoyl-2-acetyl-*sn*-glycerol induced an elevation in the resting intracellular calcium and sodium in all three genotypes, and this was greater in *RYR1*-p.G2435R (greater in homozygous than

heterozygous) muscle than wild-type muscle (figs. 2, A and B). The elevation of intracellular calcium and the increase rate of manganese quench elicited by 1-oleoyl-2-acetyl-*sn*-glycerol was blocked either by removal of extracellular  $\text{Ca}^{2+}$  or by blocking sarcolemmal  $\text{Ca}^{2+}$  and  $\text{Na}^{+}$  entry with gadolinium or SAR7334 (figs. 3, 4, and 6). These data rule out any possibility that 1-oleoyl-2-acetyl-*sn*-glycerol increased intracellular calcium by releasing  $\text{Ca}^{2+}$  from intracellular stores and confirmed that the source of the increase was through TRPC3/6, whose expression we showed was upregulated in *RYR1*-p.G2435R compared with wild-type muscles.

Incubation of wild-type and *RYR1*-p.G2435R muscle fibers with SAR7334, a much more specific blocker of TRPC6 and TRPC3 channels than gadolinium,<sup>25</sup> reduced resting calcium in *RYR1*-p.G2435R cells (in homozygous cells less than heterozygous cells, which have less than wild-type cells) and blocked the effects of 1-oleoyl-2-acetyl-*sn*-glycerol. Local application of SAR7334 directly to the superficial muscle fibers *in vivo* reduced resting intracellular calcium in homozygous *RYR1*-p.G2435R fibers and partially inhibited the halothane-induced increase in intracellular calcium in *RYR1*-p.G2435R muscle cells. This finding in particular demonstrates that during the malignant hyperthermia episode, there is an initial sarcoplasmic reticulum-supported increase in intracellular calcium that appears to be quickly partially depleted, as demonstrated by the rapid fall in intracellular calcium from  $\sim 750$  to  $\sim 400$  nM in the SAR7334-treated leg during the same time intracellular calcium rose to  $1,373 \pm 81$  nM and then plateaus in the nontreated leg. All of these data together support the hypothesis that sarcolemmal  $\text{Ca}^{2+}$  entry plays a critical role in maintaining the new intracellular calcium steady state that has been observed during a malignant hyperthermia crisis. Furthermore, the observed immediate elevation of intracellular calcium in the SAR7334-treated leg is most probably mediated by  $\text{Ca}^{2+}$  release from the sarcoplasmic reticulum, and the decline in the intracellular calcium in this leg shows that this level cannot be maintained by sarcoplasmic reticulum  $\text{Ca}^{2+}$  cycling because of  $\text{Ca}^{2+}$  extrusion and blockade of sarcolemmal  $\text{Ca}^{2+}$  entry.

Consistent with the 1-oleoyl-2-acetyl-*sn*-glycerol-mediated elevation of intracellular calcium and sodium in muscle cells plus the ability of the transient receptor potential cation channel-specific blocker SAR7334 to block both the pharmacologic and halothane-induced increase in  $\text{Ca}^{2+}$ , we also demonstrated that hyperforin, an activator of TRPC6 mediated inward cationic current,<sup>26,31,32</sup> mimicked the action of 1-oleoyl-2-acetyl-*sn*-glycerol, and its effect was greater in *RYR1*-p.G2435R (greater in homozygous than in heterozygous mice) than wild-type muscle cells. As observed with 1-oleoyl-2-acetyl-*sn*-glycerol, removal of extracellular  $\text{Ca}^{2+}$  also eliminated the hyperforin-elicited increase in resting intracellular calcium.<sup>31</sup> The enhanced cation flux observed across the sarcolemma in

*RYR1*-p.G2435R cells is consistent with the cell boundary theorem stating that the long-term steady state of the free intracellular calcium concentration inside cells must be driven by changes with the outside through fluxes across the plasmalemma.<sup>22,33</sup>

In summary, these results demonstrated that skeletal muscles of mice expressing the *RYR1*-p.G2435R mutation have an elevated resting intracellular calcium and sodium and a significantly enhanced, extracellular  $\text{Ca}^{2+}$  dependent response to 1-oleoyl-2-acetyl-*sn*-glycerol and hyperforin. We further showed that the 1-oleoyl-2-acetyl-*sn*-glycerol response could be prevented by TRPC3 and TRPC6 blockers. These results provide further support to our working hypothesis that in response to partial depletion of sarcoplasmic reticulum calcium stores caused by malignant hyperthermia causing mutations in RyR1, TRPC3 and TRPC6 channels play a critical role in producing the intracellular calcium and sodium overload both at rest and during the malignant hyperthermia crisis.

## Research Support

Supported by National Institute of Arthritis, Musculoskeletal and Skin Diseases grant Nos. 1R01AR068897-01A1 (Bethesda, Maryland; to Drs. Allen, Hopkins, Rafael Lopez, and Liu) and 2P01AR-05235 (to Drs. Allen, Rafael Lopez, and Hopkins), by Medical Research Council grant No. N002407/1 (London, United Kingdom; to Drs. Kaura, Hopkins, and Allen), and AFM-Télèthon-France grant No. 21543 (Evry, France; to Dr. Rafael Lopez).

## Competing Interests

The authors declare no competing interests.

## Correspondence

Address correspondence to Dr. Allen: Malignant Hyperthermia Investigation Unit, St. James' University Hospital, Leeds, United Kingdom. p.d.allen@leeds.ac.uk. ANESTHESIOLOGY's articles are made freely accessible to all readers on [www.anesthesiology.org](http://www.anesthesiology.org), for personal use only, 6 months from the cover date of the issue.

## References

- Nelson TE: Malignant hyperthermia: A pharmacogenetic disease of  $\text{Ca}^{++}$  regulating proteins. *Curr Mol Med* 2002; 2:347–69
- Jurkat-Rott K, Lerche H, Lehmann-Horn F: Skeletal muscle channelopathies. *J Neurol* 2002; 249:1493–502
- Groom L, Muldoon SM, Tang ZZ, Brandom BW, Bayarsaikhan M, Bina S, Lee HS, Qiu X, Sambuughin N, Dirksen RT: Identical *de novo* mutation in the type 1 ryanodine receptor gene associated with fatal, stress-induced malignant hyperthermia in two unrelated families. *ANESTHESIOLOGY* 2011; 115:938–45
- Parness J, Bandschapp O, Girard T: The myotonias and susceptibility to malignant hyperthermia. *Anesth Analg* 2009; 109:1054–64
- Litman RS, Rosenberg H: Malignant hyperthermia: Update on susceptibility testing. *JAMA* 2005; 293:2918–24
- Robinson R, Carpenter D, Shaw MA, Halsall J, Hopkins P: Mutations in *RYR1* in malignant hyperthermia and central core disease. *Hum Mutat* 2006; 27:977–89
- Yang T, Riehl J, Esteve E, Matthaie KI, Goth S, Allen PD, Pessah IN, Lopez JR: Pharmacologic and functional characterization of malignant hyperthermia in the R163C RyR1 knock-in mouse. *ANESTHESIOLOGY* 2006; 105:1164–75
- Chelu MG, Goonasekera SA, Durham WJ, Tang W, Lueck JD, Riehl J, Pessah IN, Zhang P, Bhattacharjee MB, Dirksen RT, Hamilton SL: Heat- and anesthesia-induced malignant hyperthermia in an RyR1 knock-in mouse. *FASEB J* 2006; 20:329–30
- Lopez JR, Kaura V, Diggle CP, Hopkins PM, Allen PD: Malignant hyperthermia, environmental heat stress, and intracellular calcium dysregulation in a mouse model expressing the p.G2435R variant of *RYR1*. *Br J Anaesth* 2018; 121:953–61
- Du GG, Sandhu B, Khanna VK, Guo XH, MacLennan DH: Topology of the  $\text{Ca}^{2+}$  release channel of skeletal muscle sarcoplasmic reticulum (RyR1). *Proc Natl Acad Sci U S A* 2002; 99:16725–30
- Miller DM, Daly C, Aboelsaod EM, Gardner L, Hobson SJ, Riasat K, Shepherd S, Robinson RL, Bilmen JG, Gupta PK, Shaw MA, Hopkins PM: Genetic epidemiology of malignant hyperthermia in the UK. *Br J Anaesth* 2018; 121:944–52
- Robinson RL, Brooks C, Brown SL, Ellis FR, Halsall PJ, Quinnell RJ, Shaw MA, Hopkins PM: *RYR1* mutations causing central core disease are associated with more severe malignant hyperthermia *in vitro* contracture test phenotypes. *Hum Mutat* 2002; 20:88–97
- Carpenter D, Robinson RL, Quinnell RJ, Ringrose C, Hogg M, Casson F, Booms P, Iles DE, Halsall PJ, Steele DS, Shaw MA, Hopkins PM: Genetic variation in *RYR1* and malignant hyperthermia phenotypes. *Br J Anaesth* 2009; 103:538–48
- López JR, Alamo L, Caputo C, DiPolo R, Vergara S: Determination of ionic calcium in frog skeletal muscle fibers. *Biophys J* 1983; 43:1–4
- Lopez JR, Alamo LA, Jones DE, Papp L, Allen PD, Gergely J, Sréter FA:  $[\text{Ca}^{2+}]_i$  in muscles of malignant hyperthermia susceptible pigs determined *in vivo* with  $\text{Ca}^{2+}$  selective microelectrodes. *Muscle Nerve* 1986; 9:85–6
- Yang T, Esteve E, Pessah IN, Molinski TF, Allen PD, López JR: Elevated resting  $[\text{Ca}^{2+}]_i$  in myotubes expressing



- malignant hyperthermia RyR1 cDNAs is partially restored by modulation of passive calcium leak from the SR. *Am J Physiol Cell Physiol* 2007; 292:C1591–8
17. Eltit JM, Bannister RA, Moua O, Altamirano F, Hopkins PM, Pessah IN, Molinski TF, López JR, Beam KG, Allen PD: Malignant hyperthermia susceptibility arising from altered resting coupling between the skeletal muscle L-type  $\text{Ca}^{2+}$  channel and the type 1 ryanodine receptor. *Proc Natl Acad Sci U S A* 2012; 109:7923–8
  18. Feng W, Barrientos GC, Cherednichenko G, Yang T, Padilla IT, Truong K, Allen PD, Lopez JR, Pessah IN: Functional and biochemical properties of ryanodine receptor type 1 channels from heterozygous R163C malignant hyperthermia-susceptible mice. *Mol Pharmacol* 2011; 79:420–31
  19. López JR, Allen PD, Alamo L, Jones D, Sreter FA: Myoplasmic free  $[\text{Ca}^{2+}]$  during a malignant hyperthermia episode in swine. *Muscle Nerve* 1988; 11:82–8
  20. Yuen B, Boncompagni S, Feng W, Yang T, Lopez JR, Matthaei KI, Goth SR, Protasi F, Franzini-Armstrong C, Allen PD, Pessah IN: Mice expressing T4826I-RYR1 are viable but exhibit sex- and genotype-dependent susceptibility to malignant hyperthermia and muscle damage. *FASEB J* 2012; 26:1311–22
  21. Altamirano F, Eltit JM, Robin G, Linares N, Ding X, Pessah IN, Allen PD, López JR:  $\text{Ca}^{2+}$  influx via the  $\text{Na}^+/\text{Ca}^{2+}$  exchanger is enhanced in malignant hyperthermia skeletal muscle. *J Biol Chem* 2014; 289:19180–90
  22. Eltit JM, Ding X, Pessah IN, Allen PD, Lopez JR: Nonspecific sarcolemmal cation channels are critical for the pathogenesis of malignant hyperthermia. *FASEB J* 2013; 27:991–1000
  23. Yang T, Allen PD, Pessah IN, Lopez JR: Enhanced excitation-coupled calcium entry in myotubes is associated with expression of RyR1 malignant hyperthermia mutations. *J Biol Chem* 2007; 282:37471–8
  24. Hofmann T, Obukhov AG, Schaefer M, Harteneck C, Gudermann T, Schultz G: Direct activation of human TRPC6 and TRPC3 channels by diacylglycerol. *Nature* 1999; 397:259–63
  25. Maier T, Follmann M, Hessler G, Kleemann HW, Hachtel S, Fuchs B, Weissmann N, Linz W, Schmidt T, Löhn M, Schroeter K, Wang L, Rütten H, Strübing C: Discovery and pharmacological characterization of a novel potent inhibitor of diacylglycerol-sensitive TRPC cation channels. *Br J Pharmacol* 2015; 172:3650–60
  26. Leuner K, Kazanski V, Müller M, Essin K, Henke B, Gollasch M, Harteneck C, Müller WE: Hyperforin: A key constituent of St. John's wort specifically activates TRPC6 channels. *FASEB J* 2007; 21:4101–11
  27. Bouron A, Chauvet S, Dryer S, Rosado JA: Second messenger-operated calcium entry through TRPC6. *Adv Exp Med Biol* 2016; 898:201–49
  28. Gudermann T, Hofmann T, Mederos y Schnitzler M, Dietrich A: Activation, subunit composition and physiological relevance of DAG-sensitive TRPC proteins. *Novartis Found Symp* 2004; 258:103–22, 155–9, 263–6
  29. Tu P, Kunert-Keil C, Lucke S, Brinkmeier H, Bouron A: Diacylglycerol analogues activate second messenger-operated calcium channels exhibiting TRPC-like properties in cortical neurons. *J Neurochem* 2009; 108:126–38
  30. Lemos VS, Poburko D, Liao CH, Cole WC, van Breemen C:  $\text{Na}^+$  entry via TRPC6 causes  $\text{Ca}^{2+}$  entry via NCX reversal in ATP stimulated smooth muscle cells. *Biochem Biophys Res Commun* 2007; 352:130–4
  31. Leuner K, Li W, Amaral MD, Rudolph S, Calfa G, Schuwald AM, Harteneck C, Inoue T, Pozzo-Miller L: Hyperforin modulates dendritic spine morphology in hippocampal pyramidal neurons by activating  $\text{Ca}^{2+}$ -permeable TRPC6 channels. *Hippocampus* 2013; 23:40–52
  32. Treiber K, Singer A, Henke B, Müller WE: Hyperforin activates nonselective cation channels (NSCCs). *Br J Pharmacol* 2005; 145:75–83
  33. Ríos E: The cell boundary theorem: A simple law of the control of cytosolic calcium concentration. *J Physiol Sci* 2010; 60:81–4
